# Supplementary material for: Towards an Evidence-Based Classification System for Para Dressage: Associations between Impairment and Performance Measures
Source: MDPI journal article supplement (doi:10.3390/ani13172785), 2023-08-31
Supplement: s1 [file s1]

## Supplementary Tables

Descriptive statistics for Para athletes separated by grade for impairment and performance measurements.

**Table S1.** Average scores for Para athletes by grade and non-disabled athletes by level. Function In Sitting Test (FIST), Scale and Assessment of Rating for Ataxia (SARA), Trunk Impairment Scale (TIS), and Re-Modified Ashworth Scale (R-MAS). Peak handheld dynamometry measures (N) for the trunk are presented. Note: %COV for SARA and R-MAS were calculated by dividing the SD by the difference between the mean score and total available score. Grand Prix (GP), Prix St. Georges (PSG).

| Trunk Handheld Dynamometry (peak values) |   |                  |                |                 |                 |                 |                 |                  |                   |                      |                       |
|------------------------------------------|---|------------------|----------------|-----------------|-----------------|-----------------|-----------------|------------------|-------------------|----------------------|-----------------------|
|                                          | n | FIST             | SARA           | TIS             | R-MAS           | Flexion         | Extension       | Rotation to Left | Rotation to Right | Left Lateral Flexion | Right Lateral Flexion |
| Grade                                    |   |                  |                |                 |                 |                 |                 |                  |                   |                      |                       |
| 1                                        | 6 | 41.17<br>(12.38) | 7.75<br>(3.33) | 7.00<br>(5.18)  | 6.17<br>(6.49)  | 63.8<br>(38.2)  | 80.9<br>(44.6)  | 37.6<br>(22.6)   | 37.1<br>(31.0)    | 48.9<br>(25.7)       | 51.3<br>(18.8)        |
| %COV                                     |   | 30               | 27             | 74              | 36              | 60              | 55              | 60               | 84                | 53                   | 37                    |
| 2                                        | 3 | 48.00<br>(7.55)  | 4.33<br>(1.53) | 9.67<br>(6.43)  | 5.33<br>(4.73)  | 46.5<br>(20.7)  | 52.8<br>(13.4)  | 42.8<br>(16.6)   | 42.3<br>(16.0)    | 58.6<br>(26.3)       | 47.7<br>(13.2)        |
| %COV                                     |   | 16               | 10             | 67              | 25              | 45              | 25              | 39               | 38                | 45                   | 28                    |
| 3                                        | 4 | 48.25<br>(3.30)  | 4.63<br>(3.20) | 15.00<br>(7.48) | 8.75<br>(11.12) | 68.2<br>(39.9)  | 71.1<br>(57.9)  | 54.7<br>(26.1)   | 59.9<br>(24.5)    | 70.2<br>(41.8)       | 61.3<br>(40.5)        |
| %COV                                     |   | 7                | 21             | 50              | 73              | 59              | 81              | 48               | 41                | 60                   | 66                    |
| 4                                        | 6 | 55.50<br>(1.22)  | 3.42<br>(3.65) | 18.17<br>(3.60) | 2.33<br>(4.08)  | 64.2<br>(33.7)  | 86.5<br>(49.4)  | 69.1<br>(28.9)   | 62.0<br>(27.9)    | 83.2<br>(33.5)       | 76.3<br>(32.4)        |
| %COV                                     |   | 2                | 22             | 20              | 19              | 52              | 57              | 42               | 45                | 40                   | 42                    |
| 5                                        | 2 | 56.00<br>(0.00)  | 0.50<br>(0.71) | 21.00<br>(2.83) | 1.00<br>(1.41)  | 48.4<br>(1.6)   | 67.9<br>(12.8)  | 73.3<br>(8.8)    | 64.0<br>(24.0)    | 72.1<br>(4.5)        | 71.8<br>(5.3)         |
| %COV                                     |   | 0                | 4              | 13              | 6               | 3               | 19              | 12               | 38                | 6                    | 7                     |
| Level                                    |   |                  |                |                 |                 |                 |                 |                  |                   |                      |                       |
| GP                                       | 5 | 56.00<br>(0.00)  | 0.0<br>(0.0)   | 19.60<br>(0.89) | 0.00<br>(0.00)  | 108.5<br>(26.3) | 157.4<br>(43.5) | 88.0<br>(14.2)   | 88.5<br>(21.5)    | 116.3<br>(26.9)      | 118.3<br>(21.0)       |
| %COV                                     |   | 0                | 0              | 4               | 0               | 24              | 28              | 16               | 24                | 23                   | 18                    |
| PSG                                      | 6 | 56.00<br>(0.00)  | 0.0<br>(0.0)   | 20.83<br>(1.60) | 0.33<br>(0.82)  | 103.1<br>(18.8) | 128.8<br>(40.9) | 93.0<br>(25.0)   | 86.0<br>(20.8)    | 125.3<br>(34.4)      | 118.9<br>(27.7)       |
| %COV                                     |   | 0                | 0              | 8               | 4               | 18              | 32              | 27               | 24                | 27                   | 23                    |

**Table S2.** Average scores for Para athletes by grade and non-disabled athletes by level for peak handheld dynamometry (HHD) measures (N) for the limbs. Adduction (Add), External Rotation (Ex Rot), Extension (Extn). Grand Prix (GP), Prix St. Georges (PSG).

| Table 1. Peak values of the 14 variables of the 1 |  |  |  |  |  |  |  |  |  |  |  |  |  |
|---------------------------------------------------------------------------------------------------------------------------------------------------------------------------------------------------------------------------------------------------------------------------------------------------------------------------------------------------------------------------------------------------------------------------------------------------------------------------------------------------------------------------------------------------------------------------------------------------------------------------------------------------------------------------------------------------------------------------------------------------------------------------------------------------------------------------------------------------------------------------------------------------------------------------------------------------------------------------------------------------------------------------------------------------------------------------------------------------------------------------------------------------------------------------------------------------------------------------------------------------------------------------------------------------------------------------------------------------------------------------------------------------------------------------------------------------------------------------------------------------------------------------------------------------------------------------------------------------------------------------------------------------------------------------------------------------------------------------------------------------------------------------------------------------------------------------------------------------------------------------------------------------------------------------------------------------------------------------------------------------------------------------------------------------------------------------------------------------------------------------------------------------------------------------------------------------------------------------------------------------------------------------------------------------------------------------------------------------------------------------------------------------------------------------------------------------------------------------------------------------------------------------------------------------------------------------------------------------------------------------------------------------------------------------------------------------------------------------------------------------------------------------------------------------------------------------------------------------------------------------------------------------------------------------------------------------------------------------------------------------------------------------------------------------------------------------------------------------------------------------------------------------------------------------------------------------------------------------------------------------------------------------------------------------------------------------------------------------------------------------------------------------------------------------------------------------------------------------------------------------------------------------------------------------------------------------------------------------------------------------------------------------------------------------------------------------------------------------------------------------------------------------------------------------------------------------------------------------------------------------------------------------------------------------------------------------------------------------------------------------------------------------------------------------------------------------------------------------------------------------------------------------------------------------------------------------------------------------------------------------------------------------------------------------------------------------------------------------------------------------------------------------------------------------------------------------------------------------------------------------------------------------------------------------------------------------------------------------------------------------------------------------------------------------------------------------------------------------------------------------------------------------------------------------------------------------------------------------------------------------------------------------------------------------------------------------------------------------------------------------------------------------------------------------------------------------------------------------------------------------------------------------------------------------------------------------------------------------------------------------------------------------------------------------------------------------------------------------------------------------------------------------------------------------------------------------------------------------------------------------------------------------------------------------------------------------------------------------------------------------------------------------------------------------------------------------------------------------------------------------------------------------------------------------------------------------------------------------------------------------------------------------------------------------------------------------------------------------------------------------------------------------------------------------------------------------------------------------------------------------------------------------------------------------------------------------------------------------------------------------------------------------------------------------------------------------------------------------------------------------------------------------------------------------------------------------------------------------------------------------------------------------------------------------------------------------------------------------------------------------------------------------------------------------------------------------------------------------------------------------------------------------------------------------------------------------------------------------------------------------------------------------------------------------------------------------------------------------------------------------------------------------------------------------------------------------------------------------------------------------------------------------------------------------------------------------------------------------------------------------------------------------------------------------------------------------------------------------------------------------------------------------------------------------------------------------------------------------------------------------------------------------------------------------------------------------------------------------------------------------------------------------------------------------------------------------------------------------------------------------------------------------------------------------------------------------------------------------------------------------------------------------------------------------------------------------------------------------------------------------------------------------------------------------------------------------------------------------------------------------------------------------------------------------------------------------------------------------------------------------------------------------------------------------------------------------------------------------------------------------------------------------------------------------------------------------------------------------------------------------------------------------------------------------------------------------------------------------------------------------------------------------------------------------------------------------------------------------------------------------------------------------------------------------------------------------------------------------------------------------------------------------------------------------------------------------------------------------------------------------------------------------------------------------------------------------------------------------------------------------------------------------------------------------------------------------------------------------------------------------------------------------------------------------------------------------------------------------------------------------------------------------------------------------------------------------------------------------------------------------------------------------------------------------------------------------------------------------------------------------------------------------------------------------------------------------------------------------------------------------------------------------------------------------------------------------------------------------------------------------------------------------------------------------------------------------------------------------------------------------------------------------------------------------------------------------------------------------------------------------------------------------------------------------------------------------------------------------------------------------------------------------------------------------------------------------------------------------------------------------------------------------------------------------------------------------------------------------------------------------------------------------------------------------------------------------------------------------------------------------------------------------------------------------------------------------------------------------------------------------------------------------------------------------------------------------------------------------------------------------------------------------------------------------------------------------------------------------------------------------------------------------------------------------------------------------------------------------------------------------------------------------------------------------------------------------------------------------------------------------------------------------------------------------------------------------------------------------------------------------------------------------------------------------------------------------------------------------------------------------------------------------------------------------------------------------------------------------------------------------------------------------------------------------------------------------------------------------------------------------------------------------------------------------------------------------------------------------------------------------------------------------------------------------------------------------------------------------------------------------------------------------------------------------------------------------------------------------------------------------------------------------------------------------------------------------------------------------------------------------------------------------------------------------------------------------------------------------------------------------------------------------------------------------------------------------------------------------------------------------------------------------------------------------------------------------------------------------------------------------------------------------------------------------------------------------------------------------------------------------------------------------------------------------------------------------------------------------------------------------------------------------------------------------|--|--|--|--|--|--|--|--|--|--|--|--|--|
|---------------------------------------------------------------------------------------------------------------------------------------------------------------------------------------------------------------------------------------------------------------------------------------------------------------------------------------------------------------------------------------------------------------------------------------------------------------------------------------------------------------------------------------------------------------------------------------------------------------------------------------------------------------------------------------------------------------------------------------------------------------------------------------------------------------------------------------------------------------------------------------------------------------------------------------------------------------------------------------------------------------------------------------------------------------------------------------------------------------------------------------------------------------------------------------------------------------------------------------------------------------------------------------------------------------------------------------------------------------------------------------------------------------------------------------------------------------------------------------------------------------------------------------------------------------------------------------------------------------------------------------------------------------------------------------------------------------------------------------------------------------------------------------------------------------------------------------------------------------------------------------------------------------------------------------------------------------------------------------------------------------------------------------------------------------------------------------------------------------------------------------------------------------------------------------------------------------------------------------------------------------------------------------------------------------------------------------------------------------------------------------------------------------------------------------------------------------------------------------------------------------------------------------------------------------------------------------------------------------------------------------------------------------------------------------------------------------------------------------------------------------------------------------------------------------------------------------------------------------------------------------------------------------------------------------------------------------------------------------------------------------------------------------------------------------------------------------------------------------------------------------------------------------------------------------------------------------------------------------------------------------------------------------------------------------------------------------------------------------------------------------------------------------------------------------------------------------------------------------------------------------------------------------------------------------------------------------------------------------------------------------------------------------------------------------------------------------------------------------------------------------------------------------------------------------------------------------------------------------------------------------------------------------------------------------------------------------------------------------------------------------------------------------------------------------------------------------------------------------------------------------------------------------------------------------------------------------------------------------------------------------------------------------------------------------------------------------------------------------------------------------------------------------------------------------------------------------------------------------------------------------------------------------------------------------------------------------------------------------------------------------------------------------------------------------------------------------------------------------------------------------------------------------------------------------------------------------------------------------------------------------------------------------------------------------------------------------------------------------------------------------------------------------------------------------------------------------------------------------------------------------------------------------------------------------------------------------------------------------------------------------------------------------------------------------------------------------------------------------------------------------------------------------------------------------------------------------------------------------------------------------------------------------------------------------------------------------------------------------------------------------------------------------------------------------------------------------------------------------------------------------------------------------------------------------------------------------------------------------------------------------------------------------------------------------------------------------------------------------------------------------------------------------------------------------------------------------------------------------------------------------------------------------------------------------------------------------------------------------------------------------------------------------------------------------------------------------------------------------------------------------------------------------------------------------------------------------------------------------------------------------------------------------------------------------------------------------------------------------------------------------------------------------------------------------------------------------------------------------------------------------------------------------------------------------------------------------------------------------------------------------------------------------------------------------------------------------------------------------------------------------------------------------------------------------------------------------------------------------------------------------------------------------------------------------------------------------------------------------------------------------------------------------------------------------------------------------------------------------------------------------------------------------------------------------------------------------------------------------------------------------------------------------------------------------------------------------------------------------------------------------------------------------------------------------------------------------------------------------------------------------------------------------------------------------------------------------------------------------------------------------------------------------------------------------------------------------------------------------------------------------------------------------------------------------------------------------------------------------------------------------------------------------------------------------------------------------------------------------------------------------------------------------------------------------------------------------------------------------------------------------------------------------------------------------------------------------------------------------------------------------------------------------------------------------------------------------------------------------------------------------------------------------------------------------------------------------------------------------------------------------------------------------------------------------------------------------------------------------------------------------------------------------------------------------------------------------------------------------------------------------------------------------------------------------------------------------------------------------------------------------------------------------------------------------------------------------------------------------------------------------------------------------------------------------------------------------------------------------------------------------------------------------------------------------------------------------------------------------------------------------------------------------------------------------------------------------------------------------------------------------------------------------------------------------------------------------------------------------------------------------------------------------------------------------------------------------------------------------------------------------------------------------------------------------------------------------------------------------------------------------------------------------------------------------------------------------------------------------------------------------------------------------------------------------------------------------------------------------------------------------------------------------------------------------------------------------------------------------------------------------------------------------------------------------------------------------------------------------------------------------------------------------------------------------------------------------------------------------------------------------------------------------------------------------------------------------------------------------------------------------------------------------------------------------------------------------------------------------------------------------------------------------------------------------------------------------------------------------------------------------------------------------------------------------------------------------------------------------------------------------------------------------------------------------------------------------------------------------------------------------------------------------------------------------------------------------------------------------------------------------------------------------------------------------------------------------------------------------------------------------------------------------------------------------------------------------------------------------------------------------------------------------------------------------------------------------------------------------------------------------------------------------------------------------------------------------------------------------------------------------------------------------------------------------------------------------------------------------------------------------------------------------------------------------------------------------------------------------------------------------------------------------------------------------------------------------------------------------------------------------------------------------------------------------------------------------------------------------------------------------------------------------------------------------------------------------------------------------------------------------------------------------------------------------------------------------------------------------------------------------------------------------------------------------------------------------------------------------------------------------------------------------------------------------------------------------------------------------------------------------------------------------------------|--|--|--|--|--|--|--|--|--|--|--|--|--|

|       |   |                 |                 |                       |                  |                 |                 |                |                |                |                 |                |                 |
|-------|---|-----------------|-----------------|-----------------------|------------------|-----------------|-----------------|----------------|----------------|----------------|-----------------|----------------|-----------------|
| %COV  |   | 182             | 173             | 180                   | 124              | 53              | 72              | 56             | 68             | 86             | 119             | 77             | 95              |
| 2     | 3 | 29.8<br>(28.5)  | 27.9<br>(24.8)  | 19.83<br>(17.92)<br>) | 23.85<br>(23.51) | 49.0<br>(21.9)  | 54.8<br>(28.3)  | 42.0<br>(12.8) | 52.0<br>(19.3) | 46.7<br>(19.8) | 42.7<br>(12.9)  | 56.4<br>(25.7) | 62.0<br>(36.1)  |
| %COV  |   | 96              | 89              | 90                    | 99               | 45              | 52              | 30             | 37             | 42             | 30              | 46             | 58              |
| 3     | 4 | 62.1<br>(69.3)  | 53.9<br>(67.4)  | 18.04<br>(21.47)<br>) | 18.81<br>(22.71) | 73.5<br>(56.0)  | 73.9<br>(43.2)  | 54.5<br>(32.0) | 64.4<br>(37.7) | 66.4<br>(35.1) | 61.3<br>(33.6)  | 79.4<br>(58.9) | 81.8<br>(57.8)  |
| %COV  |   | 112             | 125             | 119                   | 121              | 76              | 58              | 59             | 59             | 53             | 55              | 74             | 71              |
| 4     | 6 | 63.3<br>(31.9)  | 59.4<br>(24.5)  | 53.01<br>(25.08)<br>) | 54.54<br>(28.03) | 72.4<br>(49.3)  | 71.3<br>(40.0)  | 53.0<br>(15.5) | 53.8<br>(21.0) | 55.3<br>(30.3) | 65.4<br>(32.2)  | 49.3<br>(18.4) | 59.0<br>(24.5)  |
| %COV  |   | 50              | 41              | 47                    | 51               | 68              | 56              | 29             | 39             | 55             | 49              | 37             | 42              |
| 5     | 2 | 83.3<br>(31.9)  | 61.0<br>(40.9)  | 54.13<br>(21.67)<br>) | 48.43<br>(32.63) | 47.7<br>(4.3)   | 63.3<br>(17.0)  | 43.1<br>(5.5)  | 46.3<br>(0.9)  | 52.3<br>(3.6)  | 51.7<br>(3.2)   | 43.2<br>(4.2)  | 56.0<br>(2.3)   |
| %COV  |   | 38              | 67              | 40                    | 67               | 9               | 27              | 13             | 2              | 7              | 6               | 10             | 4               |
| Level |   |                 |                 |                       |                  |                 |                 |                |                |                |                 |                |                 |
| GP    | 5 | 128.1<br>(29.9) | 120.9<br>(26.0) | 79.7<br>(19.6)        | 86.9<br>(32.2)   | 118.5<br>(30.5) | 122.0<br>(27.7) | 96.5<br>(25.3) | 96.8<br>(21.2) | 99.8<br>(21.0) | 110.2<br>(34.1) | 99.9<br>(24.4) | 113.6<br>(25.6) |
| %COV  |   | 23              | 22              | 25                    | 37               | 26              | 23              | 26             | 22             | 21             | 31              | 24             | 23              |
| PSG   | 6 | 112.3<br>(32.6) | 114.6<br>(41.2) | 74.4<br>(18.3)        | 72.6<br>(17.2)   | 109.0<br>(30.2) | 100.2<br>(32.0) | 76.0<br>(18.8) | 82.0<br>(18.4) | 90.4<br>(30.3) | 93.5<br>(22.2)  | 83.1<br>(19.3) | 91.6<br>(23.5)  |
| %COV  |   | 29              | 36              | 25                    | 24               | 28              | 32              | 25             | 22             | 34             | 24              | 23             | 26              |

**Table S3.** Average scores for Para athletes by grade and non-disabled athletes by level for performance measures. These are as follows; 3D simulator trunk rotation signal power (SPowersf) (deg<sup>2</sup>.s) and harmonic ratio (SRatiosf) at the stride frequency during simulated walk and trot, head stability (%), dynamic symmetry and symmetry vector for the trunk (Sym Trunk, SVector Trunk) and pelvis (Sym Pelvis, SVector Pelvis) (normalised to trunk length and pelvis width respectively) during walk, average absolute deviation of detrended coordination variability of 3D trunk to pelvis rotation (deg) during simulated walk (DVar walk) and trot (DVar Trot). Grand Prix (GP), Prix St. Georges (PSG).

|       | n | SPowe<br>r <sub>sf</sub><br>walk | SRatio<br>sf walk | SPowe<br>r <sub>sf</sub> trot | SRatio<br>sf trot | Head<br>Stabilit<br>y | Sym<br>Trunk   | SVecto<br>r<br>Trunk | Sym<br>Pelvis  | SVecto<br>r<br>Pelvis | DVar<br>walk     | DVar<br>trot     |
|-------|---|----------------------------------|-------------------|-------------------------------|-------------------|-----------------------|----------------|----------------------|----------------|-----------------------|------------------|------------------|
| Grade |   |                                  |                   |                               |                   |                       |                |                      |                |                       |                  |                  |
| 1     | 6 | 1.25<br>(0.07)                   | 1.36<br>(0.06)    | 0.39<br>(0.37)                | 7.23<br>(9.45)    | -29.7<br>(28.1)       | 1.99<br>(1.71) | 0.22<br>(0.24)       | 1.14<br>(0.54) | 0.20<br>(0.05)        | 17.63<br>(13.84) | 8.47<br>(10.86)  |
| %COV  |   | 6                                | 4                 | 95                            | 131               | 95                    | 86             | 109                  | 47             | 25                    | 79               | 128              |
| 2     | 3 | 1.24<br>(0.10)                   | 1.36<br>(0.01)    | 0.16<br>(0.03)                | 3.04<br>(0.91)    | -7.0<br>(25.5)        | 1.92<br>(0.86) | 0.17<br>(0.16)       | 1.12<br>(0.33) | 0.11<br>(0.03)        | 11.96<br>(3.32)  | 5.48<br>(0.30)   |
| %COV  |   | 8                                | 1                 | 19                            | 30                | 364                   | 45             | 94                   | 29             | 27                    | 28               | 5                |
| 3     | 4 | 1.20<br>(0.25)                   | 1.42<br>(0.10)    | 0.18<br>(0.03)                | 2.97<br>(1.18)    | -16.8<br>(22.5)       | 1.69<br>(0.58) | 0.17<br>(0.13)       | 1.90<br>(1.37) | 0.20<br>(0.04)        | 13.09<br>(4.39)  | 4.57<br>(0.67)   |
| %COV  |   | 21                               | 7                 | 17                            | 40                | 134                   | 34             | 76                   | 72             | 20                    | 34               | 15               |
| 4     | 6 | 1.34<br>(0.03)                   | 1.41<br>(0.13)    | 0.19<br>(0.03)                | 3.15<br>(1.39)    | -2.4<br>(14.0)        | 2.04<br>(0.49) | 0.11<br>(0.06)       | 1.28<br>(0.44) | 0.17<br>(0.04)        | 11.63<br>(4.19)  | 10.50<br>(15.59) |
| %COV  |   | 2                                | 9                 | 16                            | 44                | 583                   | 24             | 55                   | 34             | 24                    | 36               | 148              |

|       |   |                |                |                 |                |                |                |                |                |                |                |                |
|-------|---|----------------|----------------|-----------------|----------------|----------------|----------------|----------------|----------------|----------------|----------------|----------------|
| 5     | 2 | 1.33<br>(0.04) | 1.35<br>(0.02) | 0.19<br>(0.003) | 2.89<br>(0.64) | -5.3<br>(9.1)  | 1.35<br>(0.21) | 0.18<br>(0.01) | 0.79<br>(0.24) | 0.17<br>(0.02) | 6.45<br>(1.00) | 4.18<br>(0.64) |
| %COV  |   | 3              | 1              | 2               | 22             | 172            | 16             | 6              | 30             | 12             | 16             | 15             |
| Level |   |                |                |                 |                |                |                |                |                |                |                |                |
| GP    | 5 | 0.74<br>(0.43) | 1.38<br>(0.05) | 0.17<br>(0.05)  | 2.76<br>(0.41) | -3.1<br>(13.7) | 1.11<br>(0.24) | 0.11<br>(0.05) | 1.07<br>(0.14) | 0.18<br>(0.02) | 9.33<br>(2.79) | 4.92<br>(2.18) |
| %COV  |   | 58             | 4              | 29              | 15             | 442            | 22             | 45             | 13             | 11             | 30             | 44             |
| PSG   | 6 | 1.32<br>(0.05) | 1.33<br>(0.04) | 0.22<br>(0.03)  | 9.46<br>(15.7) | 9.4<br>(12.8)  | 0.75<br>(0.40) | 0.06<br>(0.04) | 0.98<br>(0.24) | 0.18<br>(0.03) | 8.14<br>(3.06) | 6.46<br>(1.74) |
| %COV  |   | 4              | 3              | 14              | 166            | 136            | 53             | 66             | 24             | 17             | 38             | 27             |
